# Supplementary material
Source: publisher site journal article supplement (https://www.dovepress.com/article/204662)
Supplement: Supplementary file 1 [file get_supplementary_file.php]

## Appendix

### Research Instrument

| Constructs                      | Items                                                                                                                                                                                       | Factor Loadings |
|---------------------------------|---------------------------------------------------------------------------------------------------------------------------------------------------------------------------------------------|-----------------|
| <b>Employee staffing</b>        | ES1: Our organization staff selection process is rigorous                                                                                                                                   | 0.834           |
|                                 | ES2: We primarily hire applicants that currently possess the necessary knowledge and skills                                                                                                 | 0.835           |
|                                 | ES3: Our organization's employee staffing is based on the prospective future organizational performance.                                                                                    | 0.816           |
|                                 | ES4: Our organizational selection is based on the expertise and skills set of potential candidates.                                                                                         | 0.681           |
| <b>Performance Management</b>   | PM1: Our performance appraisal is based on employees' work outcomes                                                                                                                         | 0.77            |
|                                 | PM2: Employees behavior is an important factor for performance appraisal.                                                                                                                   | 0.809           |
|                                 | PM3: Employees who perform Insufficient carries less salary                                                                                                                                 | 0.739           |
|                                 | PM4: The employee's performance appraisal is based on the objective and quantifiable results                                                                                                | 0.793           |
| <b>Staff Development</b>        | SD1: Our organization has formal training activates                                                                                                                                         | 0.613           |
|                                 | SD2: Our organization has comprehensive employee training policies and programs.                                                                                                            | 0.732           |
|                                 | SD3: Our organization has newly hired induction training programs for employees                                                                                                             | 0.809           |
|                                 | SD4: In our organization, on-job training is important than formal.                                                                                                                         | 0.788           |
| <b>Compensation and Benefit</b> | CB1: Our compensation package is more competitive than other organizations in the same industry                                                                                             | 0.817           |
|                                 | CB2: Our organization considers external pay comparability in determining employee compensation                                                                                             | 0.833           |
|                                 | CB3: Our remuneration package is intended to promote employee retention                                                                                                                     | 0.814           |
|                                 | CB4: We modify the compensation system to encourage managers to achieve long-term strategic objectives                                                                                      | 0.722           |
| <b>Product Innovation</b>       | PDIn1: In comparison with competitors, our organization has introduced more innovative products and services during the past 3 years                                                        | 0.73            |
|                                 | PDIn2: We manage to cope with market demands and develop new products and services quickly through innovativeness                                                                           | 0.768           |
|                                 | PDIn3: In introducing new products our organization is often first-to-market.                                                                                                               | 0.761           |
|                                 | PDIn4: Our organization always maintains product quality.                                                                                                                                   | 0.805           |
| <b>Process Innovation</b>       | PCIn1: New and significantly improved technological supporting activates for our processes, such as system maintenance, purchasing operations, accounting, and computing supports employees | 0.874           |

|                                               |                                                                                                                                                                             |       |
|-----------------------------------------------|-----------------------------------------------------------------------------------------------------------------------------------------------------------------------------|-------|
|                                               | <b>PCIn2:</b> New or significantly innovative processes improve of organizational services.                                                                                 | 0.84  |
|                                               | <b>PCIn3:</b> Our organization facilitates new innovative processes to improve quality and cost reduction.                                                                  | 0.837 |
|                                               | <b>PCIn4:</b> Our organization introduces innovative, improved logistics, delivery and distribution methods that increase the sustainability of organizational performance. | 0.747 |
| <b>Knowledge Innovation</b>                   | <b>KLn1:</b> Our organization has knowledge-based processes.                                                                                                                | 0.91  |
|                                               | <b>KLn2:</b> There exist formal processes in our organization to share the best practice among the different fields of activities.                                          | 0.897 |
|                                               | <b>KLn3:</b> Our organization has ability to generate new knowledge from existing knowledge.                                                                                | 0.865 |
|                                               | <b>KLn4:</b> There exist processes in our organization for using new knowledge to develop different products or services.                                                   | 0.91  |
| <b>Sustainable Organizational Performance</b> | <b>SOP1:</b> During production and service supply, our operational cost, is low to our competitors.                                                                         | 0.847 |
|                                               | <b>SOP2:</b> Our net profit with creative products/services is much better than to our competitors.                                                                         | 0.845 |
|                                               | <b>SOP3:</b> Our creative products/services incorporate the concepts of environmental sustainability and organizational knowledge.                                          | 0.828 |
